# Supplementary material
Source: PubMed Central journal article supplement (PMC3057879)
Supplement: NIHMS222032-supplement-supplement_1.pdf [file NIHMS222032-supplement-supplement_1.pdf]

Supplemental Figure legend. Development of Glo-3A antibodies frequently precedes or coincides with TTG-IgA seroconversion. Variation of Glo3A-IgG antibody (—◆—) and TTG-IgA level (—▲—) at different ages in 50 Celiac Disease Autoantibody (CDA) cases from Denver. In several cases a peak with high level of Glo-3A is present years before the cases became positive for TTG. There was frequently an inverse relationship between TTG and Glo-3A, such that the level of Glo-3A antibody was high, TTG -IgA was low (e.g. cases No:1-7 and 10-12). Even in cases when Glo-3A antibody level was low, a pattern was present in which Glo-3A antibodies peaked before TTG-IgA (e.g. cases No: 13-15 and 20-21). TTG-IgA level is expressed as an index which is defined as:  $(\text{unknown sample cpm} - \text{negative control cpm}) / (\text{positive control cpm} - \text{negative control cpm})^1$ .

---

<sup>1</sup> Bao, F., L. Yu, S. Babu, T. Wang, E. J. Hoffenberg, M. Rewers, and G. S. Eisenbarth. 1999. One third of HLA DQ2 homozygous patients with type 1 diabetes express celiac disease-associated transglutaminase autoantibodies. *J.Autoimmun.* 13:143-148.

# Supplemental Figure 1

■— Glo-3A Antibody Level  
▲— TTG-IgA Level

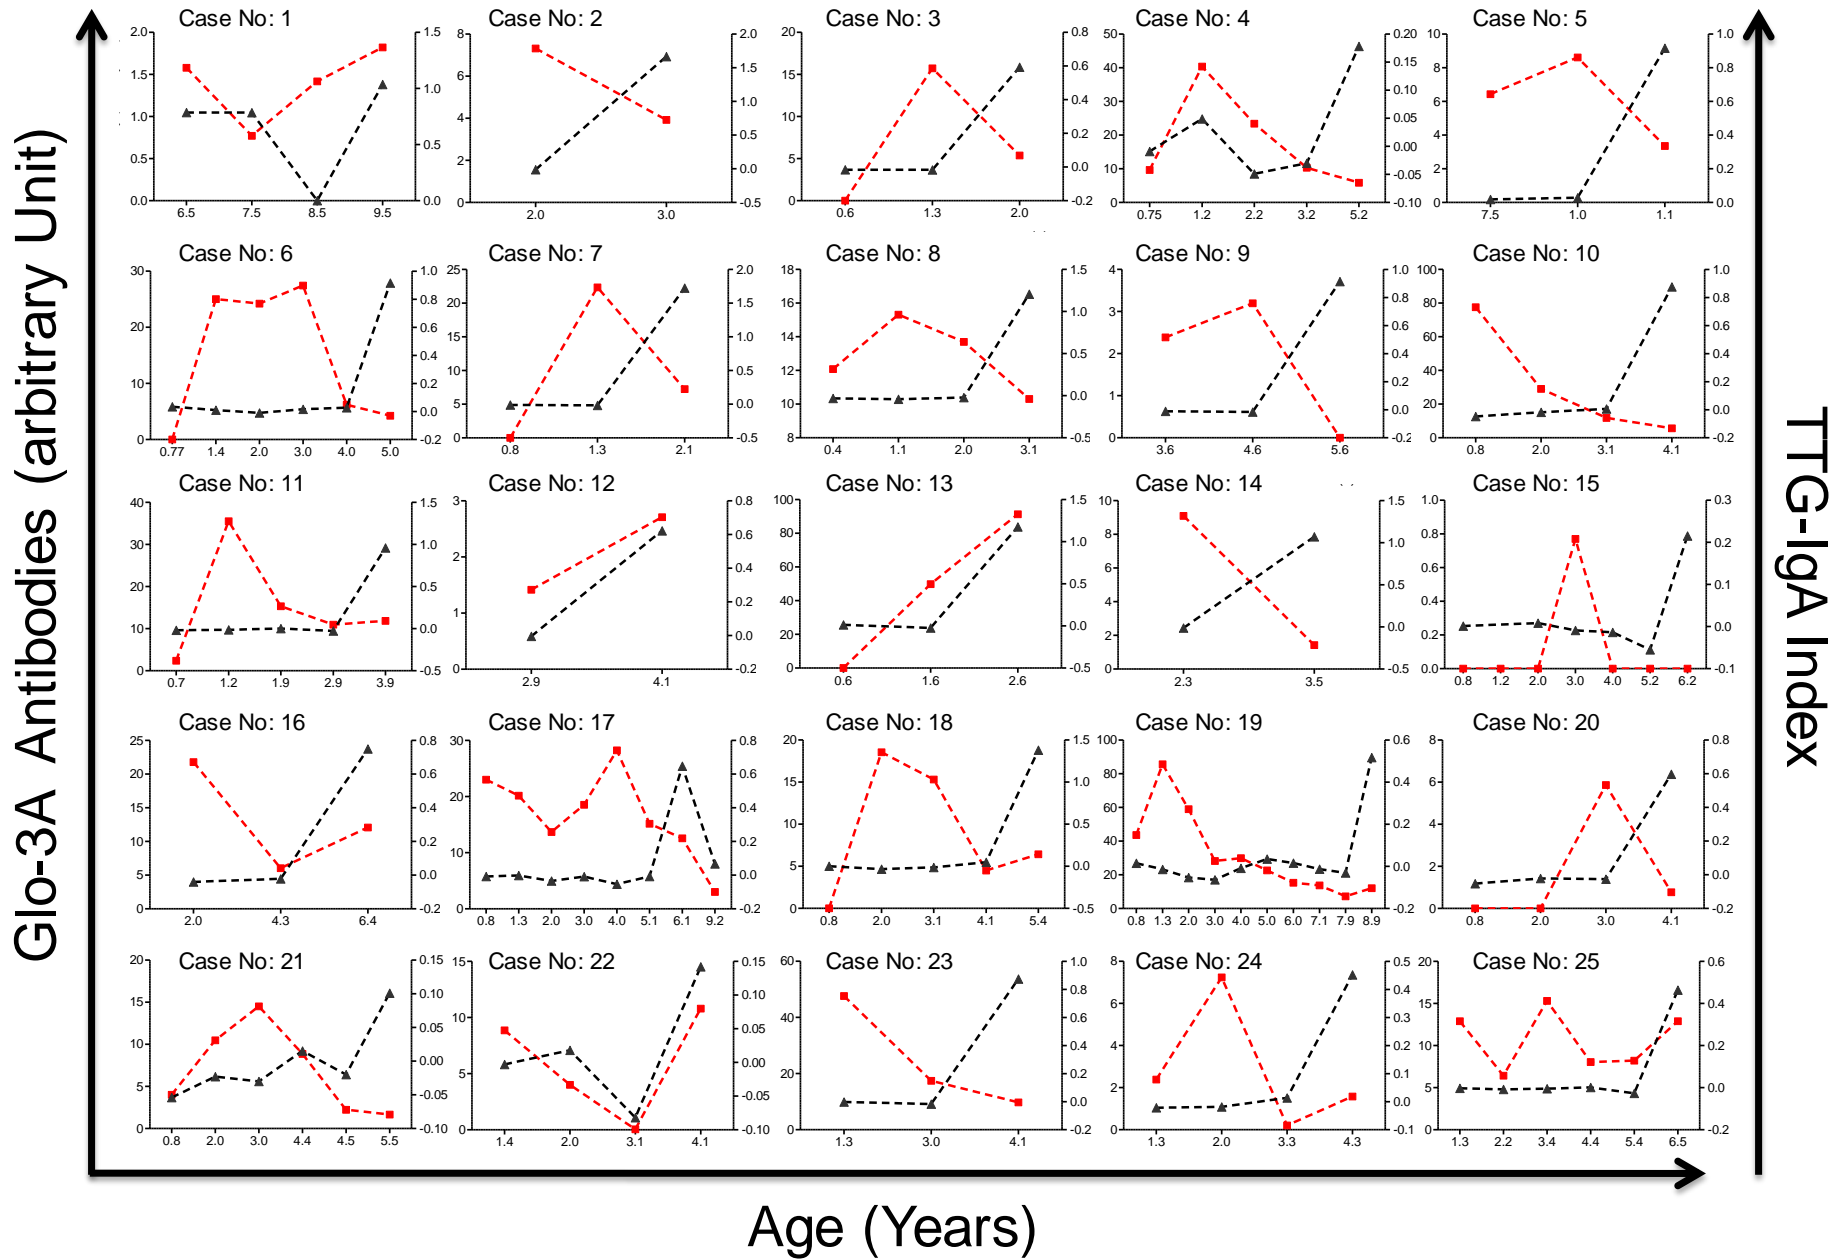

■ Glo-3A Antibody Level

▲ TTG-IgA Level

Glo-3A Antibodies (arbitrary Unit)

TTG-IgA Index

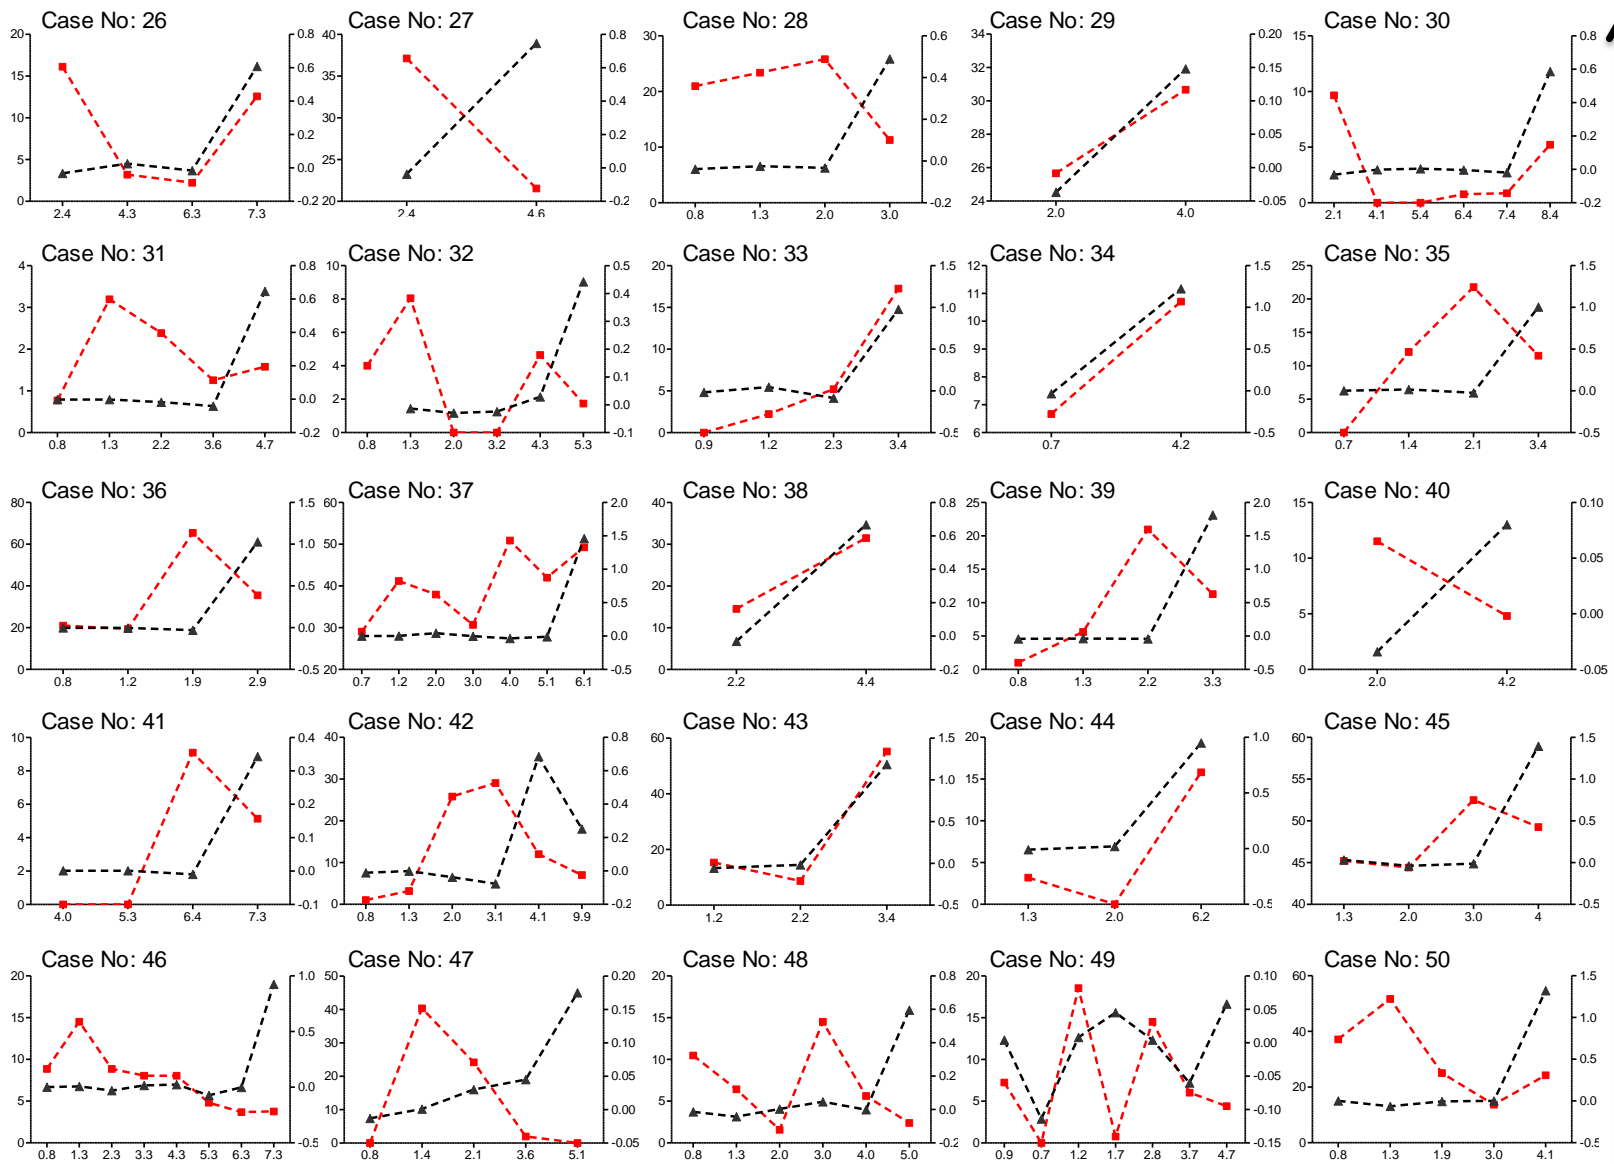

Age (Years)
